# Supplementary material for: Efficient all-small-molecule organic solar cells based on a fluorinated small-molecule donor
Source: Royal Society of Chemistry journal article supplement (doi:10.1039/d2nj00505k), 2022-01-01
Supplement: d2nj00505k1.pdf [file d2nj00505k1.pdf]

Electronic Supplementary Information (ESI) for New Journal of Chemistry  
This journal is (c) The Royal Society of Chemistry 2022

## Supplementary Information

### **Efficient all-small-molecule organic solar cells based on a fluorinated small-molecule donor**

Nailiang Qiu<sup>1\*</sup>, Chunyan Liu<sup>1,2</sup>, Haijiao Lang<sup>1</sup>, Jingyang Xu<sup>1</sup>, Rui Su<sup>1</sup>, Jie Jiang<sup>1</sup>,  
Jiaqi Tian<sup>1</sup>, Jisen Li<sup>1\*</sup>

<sup>1</sup>School of Chemistry, Chemical Engineering and Materials, Jining University, Qufu,  
China.

<sup>2</sup>School of Materials Science & Engineering, Tianjin Key Laboratory for  
Photoelectric Materials and Devices, Key Laboratory of Display Materials &  
Photoelectric Devices, Ministry of Education, Tianjin University of Technology,  
Tianjin, China.

\*Corresponding authors.

E-mail: nlqiu@jnxu.edu.cn (N Qiu); senjili@sina.com (J Li)

## Materials and synthesis of BTEHR-FT

All reactions and manipulations were carried out using standard Schlenk techniques under argon atmosphere. The solvents were purified and dried according to standard procedures. The non-fullerene acceptor F-2Cl was prepared according to the reported procedure.<sup>1</sup> Compound 1 and 2 were purchased from Woerjiming (Beijing) Technology Development Institute. The other materials were commercially available and used without further purification.

Compound 3: Under the protection of argon, the weighed compound 1 (0.40 g, 0.43 mmol), compound 2 (0.54 g, 0.93 mmol) and Pd(PPh<sub>3</sub>)<sub>4</sub> (30 mg) were placed into the dehydrated toluene (25 mL). And the reaction solution was stirred for 24 h at 110 °C under dark condition. After removing the solvent, the crude product was purified by silica gel chromatography using petroleum ether/dichloromethane (1:1.5, v/v) as the eluent. Finally, the pure compound 3 was obtained as a red solid (0.57 g, 83%). <sup>1</sup>H NMR (400 MHz, CDCl<sub>3</sub>), δ (ppm): 9.83 (s, 2H), 7.60 (s, 4H), 7.24 (s, 2H), 7.17 (s, 4H), 7.14 (s, 2H), 7.13 (s, 2H), 2.82-2.75 (m, 12H), 1.71-1.68 (m, 10H), 1.45-1.25 (m, 56H), 1.01-0.86 (m, 24H). <sup>13</sup>C NMR (100 MHz, CDCl<sub>3</sub>), δ (ppm): 183.74, 155.62, 153.11, 146.94, 146.47, 143.13, 141.48, 139.26, 138.90, 138.52, 137.77, 137.08, 135.79, 135.46, 133.95, 128.33, 126.07, 125.64, 124.36, 123.06, 120.83, 118.14, 41.35, 40.71, 34.38, 32.63, 32.58, 29.68, 29.53, 28.93, 28.87, 28.82, 25.89, 25.86, 25.75, 25.71, 23.09, 23.06, 19.79, 14.18, 10.87. MALDI-TOF MS: calcd for C<sub>92</sub>H<sub>116</sub>F<sub>2</sub>O<sub>2</sub>S<sub>10</sub> [M+H]<sup>+</sup>, 1611.62; found: 1611.89.

**BTEHR-FT:** The compound **3** (120 mg, 0.074 mmol) and 3-(2-ethylhexyl)rhodanine (182.6 mg, 0.74 mmol) were dissolved in dry CHCl<sub>3</sub> (15 mL), and then the solution was deoxygenated using argon gas for 10 min. Subsequently, dry piperidine (0.1 mL) was added by syringe and the reaction solution was heated to 60 °C. After stirring for 15 h, the mixture was poured into water (100mL) and extracted using CHCl<sub>3</sub> (50 mL × 3). The combined organic layer was washed twice using water and then dried by anhydrous Na<sub>2</sub>SO<sub>4</sub>. After removal of solvent, the crude product was chromatographed by silica gel using petroleum ether/CHCl<sub>3</sub> (1:2, v/v) as the eluent, yielding a powdery dark purple solid (131.6 mg, 86%). <sup>1</sup>H NMR (400 MHz, CDCl<sub>3</sub>), δ (ppm): 7.67 (s, 2H), 7.50 (t, 2H), 7.16 (d, 6H), 7.05 (d, 4H), 3.97 (d, 4H), 2.86 (d, 4H), 2.76-2.73 (m, 8H), 2.05-2.03 (m, 2H), 1.74-1.66 (m, 10H), 1.41-1.26 (m, 72H), 1.02-0.88 (m, 36H). <sup>13</sup>C NMR (100 MHz, CDCl<sub>3</sub>), δ (ppm): 192.54, 167.91, 155.60, 153.06, 140.86, 139.37, 138.43, 137.78, 137.36, 137.13, 135.12, 135.01, 134.82, 133.87, 133.77, 130.84, 128.49, 127.07, 126.04, 124.64, 122.60, 122.47, 122.29, 120.33, 118.09, 117.81, 48.69, 40.88, 37.02, 32.56, 31.94, 31.91, 31.44, 30.53, 30.43, 30.20, 29.85, 29.78, 29.71, 29.63, 29.53, 29.49, 29.49, 29.36, 29.32, 28.90, 28.47, 25.90, 23.93, 23.11, 23.01, 22.70, 14.26, 14.14, 14.07, 10.95, 10.55. MS (MALDI-TOF): calcd for C<sub>114</sub>H<sub>150</sub>F<sub>2</sub>N<sub>2</sub>O<sub>2</sub>S<sub>14</sub> [M+H]<sup>+</sup>, 2065.78, found: 2065.70.

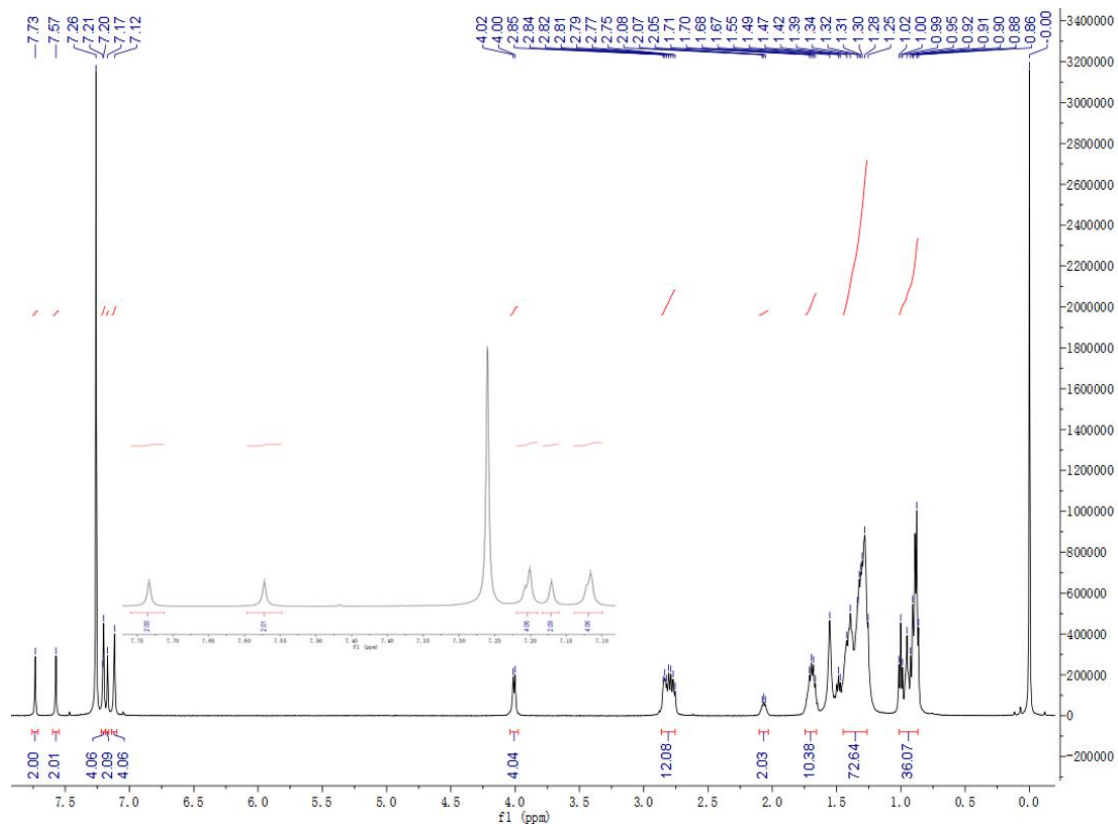

**Fig. S1**  $^1\text{H}$  NMR spectra of compound BTEHR-FT at 300K in  $\text{CDCl}_3$ .

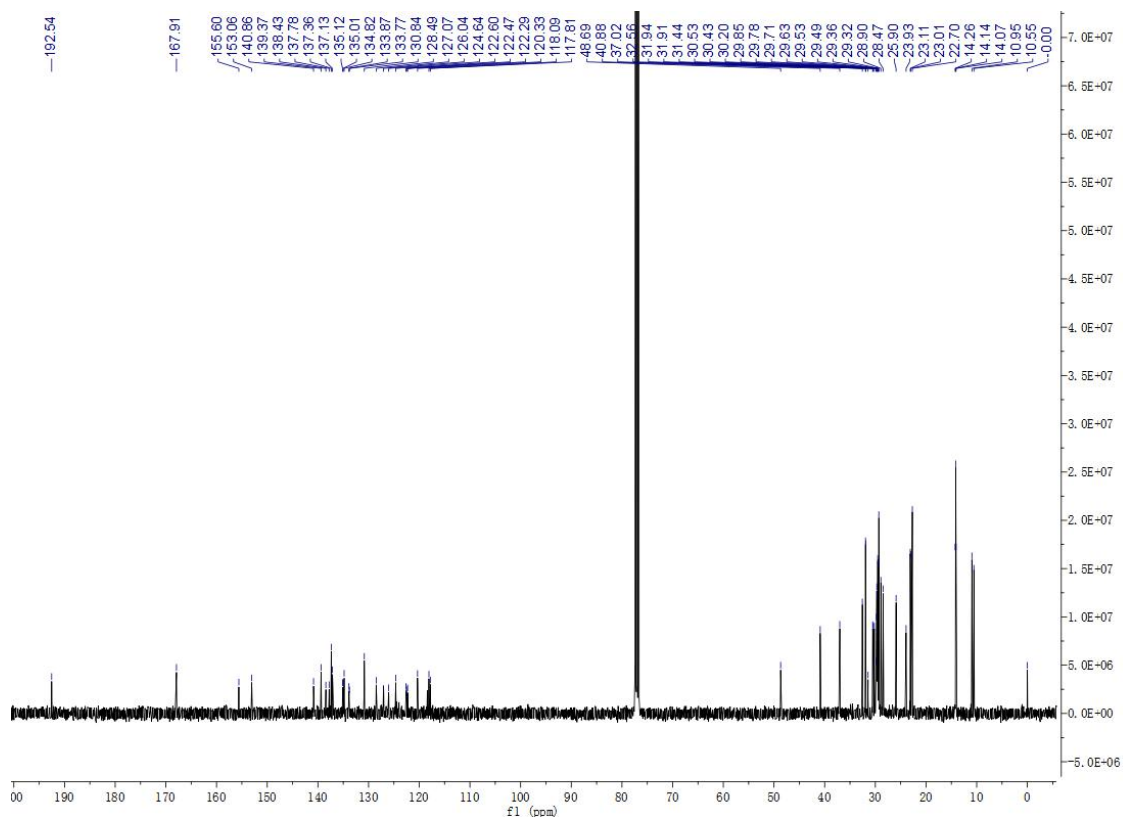

**Fig. S2**  $^{13}\text{C}$  NMR spectra of compound BTEHR-FT at 300K in  $\text{CDCl}_3$ .

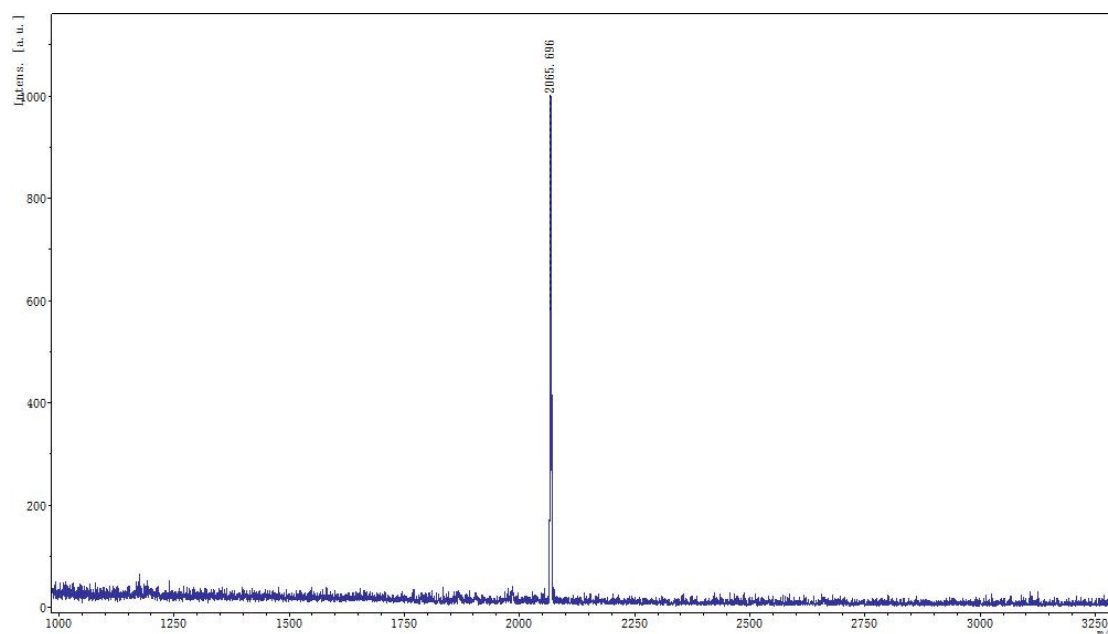

**Figure S3** The MALDI-TOF MS plot of compound BTEHR-FT.

### Measurements and Instruments

The  $^1\text{H}$  and  $^{13}\text{C}$  nuclear magnetic resonance (NMR) spectra were obtained using a Bruker AV400 Spectrometer. Matrix assisted laser desorption/ionization time-of-flight (MALDI-TOF) mass spectrometry were performed on a Bruker Autoflex III instrument. The thermogravimetric analysis (TGA) was carried out on a NETZSCH STA 449 F5 Jupiter instrument with the heating rate of  $10\text{ }^\circ\text{C min}^{-1}$  under purified nitrogen gas flow. UV-vis spectra were obtained with a JASCO V-570 spectrophotometer. X-ray diffraction (XRD) experiments were performed on a Bruker Model D8 FOCUS X-ray diffractometer with Cu  $K\alpha$  radiation ( $\lambda = 1.5406\text{ \AA}$ ) at a generator voltage of 40 kV and a current of 40 mA. Cyclic voltammetry (CV) experiments were performed with a LK98B II Microcomputer-based Electrochemical Analyzer in acetonitrile solution. All measurements were carried out at room

temperature with a conventional three-electrode configuration using a glassy carbon electrode as the working electrode, a saturated calomel electrode (SCE) as the reference electrode, and a platinum wire as the counter electrode. Tetrabutylammonium phosphorus hexafluoride ( $n\text{-Bu}_4\text{NPF}_6$ , 0.1 M) in acetonitrile was used as the supporting electrolyte, and the scan rate was 100  $\text{mV s}^{-1}$ . The Differential scanning calorimetry (DSC) measurement was carried out on a Setline STA instrument with the heating rate of 10  $^\circ\text{C min}^{-1}$  under purified nitrogen gas flow. The photoluminescence (PL) measurements were performed by the HORIBA Scientific Fluorolog-3 instrument.

The current density-voltage ( $J$ - $V$ ) characteristics of ASM-OSC devices were measured with a Keithley 2400 source-measure unit. Using a SAN-EI XES-70S1 AAA class solar simulator, photocurrent was performed under illumination with simulated 100  $\text{mW cm}^{-2}$  AM 1.5G irradiation. The external quantum efficiency (EQE) curve was obtained by a QE-R Solar Cell Spectral Response Measurement System. The film thicknesses were parallel tested by VeecoDektak 150 profilometer.

Space charge limited current (SCLC) mobility was performed by a diode configuration of ITO/ZnO/active layer/Al for electron mobility and ITO/PEDOT:PSS/active layer/Au for hole mobility, respectively. The results were fitted via a space charge limited form, being described as the equation:

$$J = \frac{9\varepsilon_0\varepsilon_r\mu_0V^2}{8L^3} \exp\left(0.89\beta\sqrt{\frac{V}{L}}\right)$$

where  $J$  is the current density,  $\varepsilon_0$  is the permittivity of free space ( $8.85 \times 10^{-12}$  F  $\text{m}^{-1}$ ),  $\varepsilon_r$  is the relative dielectric constant of the transport medium,  $\mu_0$  is the hole or

electron mobility,  $V (= V_{\text{appl}} - V_{\text{bi}})$  is the internal voltage in the device, where  $V_{\text{appl}}$  is the applied voltage to the device and  $V_{\text{bi}}$  is the built-in voltage due to the relative work function difference of the two electrodes,  $L$  is the film thickness of the active layer. Atomic force microscopy (AFM) and Transmission electron microscopy (TEM) images were obtained on a Bruker MultiMode 8 in tapping mode and Philips Technical G2 F20 at 200 kV, respectively.

### **Fabrication of ASM-OSC devices**

The ASM-OSC devices were fabricated with conventional structure of ITO/PEDOT:PSS/active layer/PDINO/Al as the following procedures. The ITO-coated glasses were cleaned using a detergent scrub, and subsequently subjected to ultrasonic treatment in soap water, deionized water, acetone and isopropyl alcohol for 15 min in each step. After drying by a nitrogen flow, the ITO substrates were treated by ultraviolet-ozone for 15 min and spin-coated with PEDOT:PSS solution at 4800 rpm for 20 s. Subsequently, the glasses were baked at 150 °C for 20 min and transferred into the glove box with argon gas. Chloroform solution of both donor (8.0 mg/mL) and acceptor (7.2 mg/mL for D/A weight ratio of 1:0.9) was spin-coated on the PEDOT:PSS at 1800 rpm for 20 s, and then annealed on the hot plate at 90 °C for 5 min (TA) or in the chloroform solvent vapor for 60 s (SVA). Afterward, PDINO with the concentration of 1.0 mg/mL using EtOH as solvent was spin-coated on the active layer at 3000 rpm for 20s. Finally, under the high vacuum, a cathode material Al was deposited onto PDINO layer. The work area of each device is about 0.04 cm<sup>2</sup>, defined by the masks for all the solar cell devices discussed in this work.

**Table S1** Photovoltaic performances of the devices based on BTEHR-FT (D):F-2Cl (A) with different weight ratio under various optimization conditions.

| D:A (w/w) | Treatment       | $V_{oc}$ (V) | $J_{sc}$ (mA cm <sup>-2</sup> ) | FF    | PCE <sub>max</sub> (%) <sup>a</sup> |
|-----------|-----------------|--------------|---------------------------------|-------|-------------------------------------|
| 1:0.8     | As cast         | 0.953        | 11.54                           | 0.633 | 6.96 (6.75 ± 0.21)                  |
| 1:0.9     | As cast         | 0.948        | 12.10                           | 0.658 | 7.55 (7.26 ± 0.29)                  |
| 1:1.0     | As cast         | 0.943        | 12.13                           | 0.628 | 7.18 (7.05 ± 0.13)                  |
| 1:0.9     | SVA(CF, 60s)    | 0.889        | 12.04                           | 0.691 | 7.39 (7.15 ± 0.24)                  |
| 1:0.9     | SVA(THF, 80s)   | 0.885        | 11.88                           | 0.679 | 7.14 (7.02 ± 0.12)                  |
| 1:0.9     | TA(70°C, 10min) | 0.931        | 15.30                           | 0.678 | 9.66 (9.42 ± 0.24)                  |
| 1:0.9     | TA(90°C, 5min)  | 0.932        | 16.59                           | 0.693 | 10.71 (10.45 ± 0.26)                |
| 1:0.9     | TA(100°C, 5min) | 0.928        | 15.98                           | 0.692 | 10.26 (10.01 ± 0.25)                |
| 1:0.9     | TA(110°C, 5min) | 0.911        | 15.78                           | 0.680 | 9.77 (9.47 ± 0.30)                  |

<sup>a</sup> Average PCE values obtained from 10 devices are shown in parentheses.

**Table S2** Photovoltaic performances of the devices based on the as cast BTEHR-FT:F-2Cl (w/w, 1:0.9) films under different rotation speed.

| Rotation speed (rpm) | $V_{oc}$ (V) | $J_{sc}$ (mA cm <sup>-2</sup> ) | FF    | PCE <sub>max</sub> (%) <sup>a</sup> |
|----------------------|--------------|---------------------------------|-------|-------------------------------------|
| 1500, 20s            | 0.951        | 11.50                           | 0.632 | 6.91 (6.66 ± 0.25)                  |
| 1700, 20s            | 0.950        | 11.81                           | 0.649 | 7.28 (6.97 ± 0.31)                  |
| 1800, 20s            | 0.948        | 12.10                           | 0.658 | 7.55 (7.26 ± 0.29)                  |
| 1900, 20s            | 0.942        | 11.89                           | 0.655 | 7.33 (7.08 ± 0.25)                  |

<sup>a</sup> Average PCE values obtained from 10 devices are shown in parentheses.

**Table S3** Photovoltaic performances of the devices based on the BTEHR-FT:F-2Cl (w/w, 1:0.9). The blend films were cast under different rotation speed, and then treated by 90 °C for 5 min.

| Rotation speed (rpm) | $V_{oc}$ (V) | $J_{sc}$ (mA cm <sup>-2</sup> ) | FF    | PCE <sub>max</sub> (%) <sup>a</sup> |
|----------------------|--------------|---------------------------------|-------|-------------------------------------|
| 1700, 20s            | 0.939        | 16.13                           | 0.685 | 10.37 (10.03 ± 0.34)                |



|           |       |       |       |                      |
|-----------|-------|-------|-------|----------------------|
| 1800, 20s | 0.932 | 16.59 | 0.693 | 10.71 (10.45 ± 0.26) |
| 1900, 20s | 0.930 | 15.94 | 0.688 | 10.20 (9.91 ± 0.29)  |

<sup>a</sup> Average PCE values obtained from 10 devices are shown in parentheses.

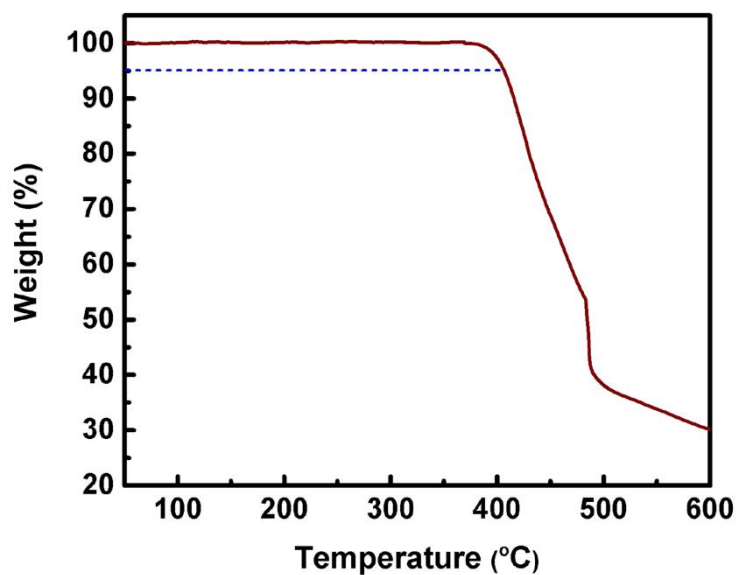

**Fig. S4** Thermogravimetric analysis plot of BTEHR-FT with a heating rate of 10 °C min<sup>-1</sup>.

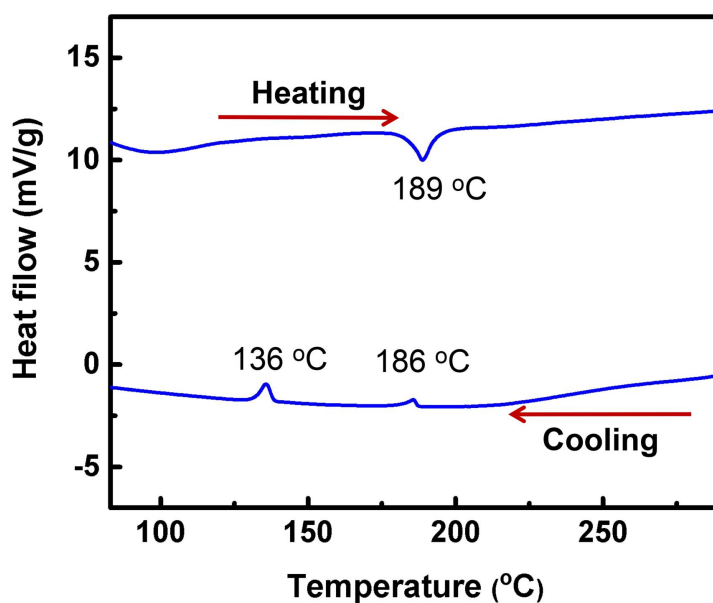

**Fig. S5** DSC curves of BTEHR-FT at a scan rate of 10 °C min<sup>-1</sup> under nitrogen.

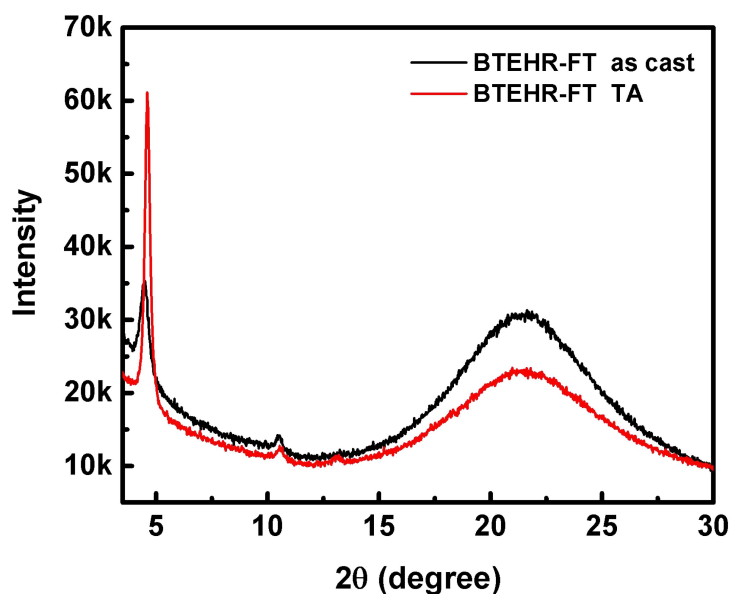

**Fig. S6** XRD patterns of BTEHR-FT films without/with thermal annealing at 90 °C for 5 min.

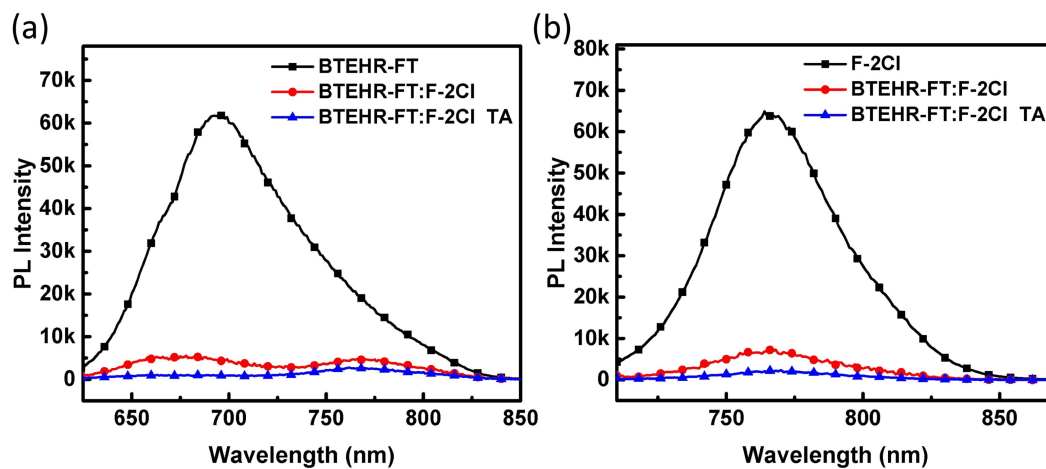

**Fig. S7** Photoluminescence (PL) spectra of (a) BTEHR-FT and the related blend films excited at 560 nm and (b) F-2CI and the related blend films excited at 700 nm.

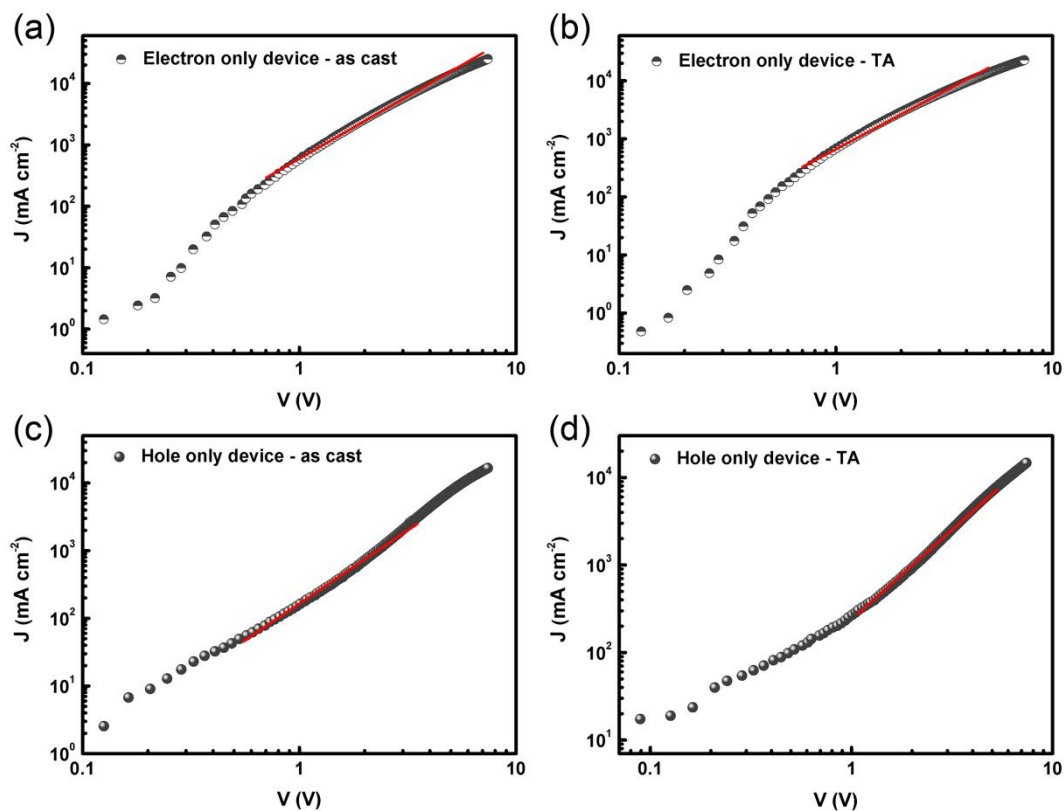

**Fig. S8** The current density-voltage ( $J$ - $V$ ) plots for electron-only devices based on BTEHR-FT:F-2Cl with (a) as cast and (b) thermal annealing (TA), and hole-only devices based on BTEHR-FT:F-2Cl with (c) as cast and (d) TA.

## References

1. Y. Wang, M. Chang, B. Kan, X. Wan, C. Li and Y. Chen, *ACS Appl. Mater. Interfaces*, 2018, **1**, 2150-2156.
